# Supplementary material for: COVID-19 infection prevention and control procedures and institutional trust: Perceptions of Canadian intensive care and emergency department nurses
Source: Springer Nature journal article supplement (doi:10.1007/s12630-021-02028-9), 2021-05-27
Supplement: MOESM1 [file 19203166]

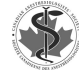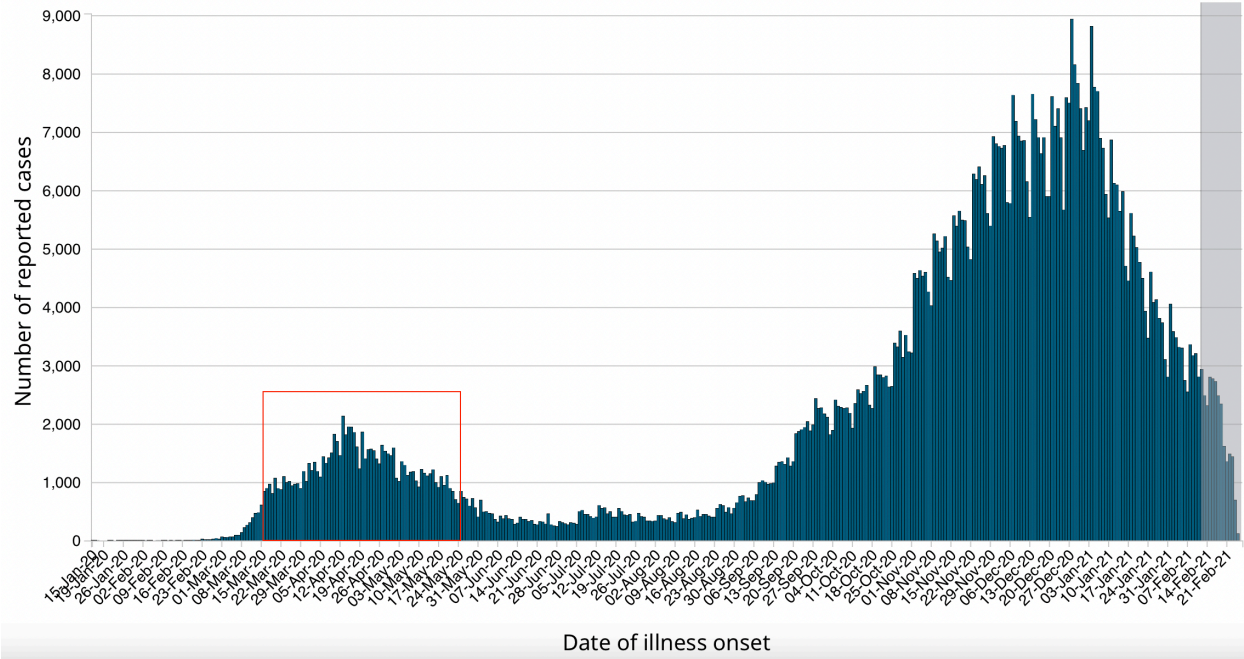

eTABLE Trust in healthcare system by length of time in independent practice

| <b>Length of time in independent practice</b> | <b>Mean Trust Score</b> | <b>Standard deviation</b> |
|-----------------------------------------------|-------------------------|---------------------------|
| Less than 5 years                             | 33.3                    | 12.1                      |
| 5 to 10 years                                 | 35.9                    | 12.6                      |
| 11 to 20 years                                | 40.7                    | 10.2                      |
| Greater than 20 years                         | 42.8                    | 14.0                      |

# HCW COVID-19

Thank you for participating in this survey to better understand how we provide care during a major outbreak. Given the ongoing Covid-19 outbreak, it is timely that we generate data that reflects current perspectives on infection prevention and control during a major respiratory infection outbreak.

The survey should take between 10-15 minutes to complete. All of your answers will be anonymous, and no identifiable information is being collected. By completing the survey, you imply that you consent to this project. All data will be securely stored, and then destroyed five years after it is analyzed.

This survey has been approved by the ethics board at the University of British Columbia, Canada. If you have any concerns or complaints about your rights as a research participant, please call the Office of Research Ethics at 604-822-8598 (Toll Free: 1-877-822-8598 or emailRSIL@ors.ubc.ca), and mention study number H20-00438

Response is only partial and is not complete. Response was added on 03/23/2020 6:36am.

---

Have you personally previously worked in a clinical setting during an acute respiratory epidemic or pandemic (for example, SARS, MERS Co-V, H1N1)?

- Yes  
 No  
 Unsure

---

In a clinical setting, did you personally care for patients with suspected or confirmed infection caused by a novel respiratory pathogen (for example, SARS, MERS Co-V, H1N1)?

- Yes  
 No  
 Unsure

---

Has a patient with suspected or confirmed Covid-19 attended the hospital in which you work?

- Yes  
 No  
 Unsure

---

Have you personally cared for a patient with suspected or confirmed Covid-19 infections?

- Yes  
 No  
 Unsure

---

In your current job role as healthcare worker, how frequently (if at all) do you have direct patient contact?

- Daily  
 More than one day per week  
 Less than one day per week  
 Rarely  
 No patient contact  
 Don't know

**The following questions relate to your experience of managing patients in the healthcare setting where you work. Please think about your experience over the past week when responding to these questions.**

### Service Demand

|                                                                                                                                           | Strongly disagree (1) | 2                     | 3                     | 4                     | 5                     | 6                     | Strongly agree (7)    |
|-------------------------------------------------------------------------------------------------------------------------------------------|-----------------------|-----------------------|-----------------------|-----------------------|-----------------------|-----------------------|-----------------------|
| The healthcare service where I work can manage current patient demand related to Covid-19                                                 | <input type="radio"/> |
| I am confident that the healthcare service where I work can continue to manage patient demand related to Covid-19 over the next 3 months. | <input type="radio"/> |
| The healthcare service where I work has an effective system for triage of patients with suspected Covid-19.                               | <input type="radio"/> |

| Skills                                                                                                                                         | Strongly disagree<br>(1) | 2                     | 3                     | 4                     | 5                     | 6                     | Strongly agree (7)    |
|------------------------------------------------------------------------------------------------------------------------------------------------|--------------------------|-----------------------|-----------------------|-----------------------|-----------------------|-----------------------|-----------------------|
| I have received sufficient training in the infection prevention and control practices specifically for Covid-19                                | <input type="radio"/>    | <input type="radio"/> | <input type="radio"/> | <input type="radio"/> | <input type="radio"/> | <input type="radio"/> | <input type="radio"/> |
| I have received general training for infection, prevention and control procedures for other communicable diseases                              | <input type="radio"/>    | <input type="radio"/> | <input type="radio"/> | <input type="radio"/> | <input type="radio"/> | <input type="radio"/> | <input type="radio"/> |
| I am confident in my ability to correctly don and doff personal protective equipment to prevent transmission of Covid-19 to others and myself. | <input type="radio"/>    | <input type="radio"/> | <input type="radio"/> | <input type="radio"/> | <input type="radio"/> | <input type="radio"/> | <input type="radio"/> |

**Social/ Professional Role and Identify**

|                                                                                                                                                                                                                                                           | Strongly disagree (1) | 2                     | 3                     | 4                     | 5                     | 6                     | Strongly agree (7)    |
|-----------------------------------------------------------------------------------------------------------------------------------------------------------------------------------------------------------------------------------------------------------|-----------------------|-----------------------|-----------------------|-----------------------|-----------------------|-----------------------|-----------------------|
| In my professional role, I know what is expected from me to deliver infection prevention and control to prevent Covid-19 spread (for example, regular hand washing, use of personal protective equipment, proper disposal of equipment) in in my hospital | <input type="radio"/> |
| It is important for me in my role to follow the recommended infection prevention and control procedures to prevent Covid-19 spread (for example, regular hand washing, use of personal protective equipment, proper disposal of equipment) at my hospital | <input type="radio"/> |

**Beliefs about consequences**

|                                                                                                                                                     | Strongly disagree<br>(1) | 2                     | 3                     | 4                     | 5                     | 6                     | Strongly agree (7)    |
|-----------------------------------------------------------------------------------------------------------------------------------------------------|--------------------------|-----------------------|-----------------------|-----------------------|-----------------------|-----------------------|-----------------------|
| I consider that the implementation of protective measures at work is generally effective to prevent the spread of Covid-19 infection in my hospital | <input type="radio"/>    | <input type="radio"/> | <input type="radio"/> | <input type="radio"/> | <input type="radio"/> | <input type="radio"/> | <input type="radio"/> |
| Following the infection prevention and control recommendations will protect me from getting Covid-19 infection                                      | <input type="radio"/>    | <input type="radio"/> | <input type="radio"/> | <input type="radio"/> | <input type="radio"/> | <input type="radio"/> | <input type="radio"/> |
| Following recommended infection, prevention and control procedures adds significant additional strain to my workload.                               | <input type="radio"/>    | <input type="radio"/> | <input type="radio"/> | <input type="radio"/> | <input type="radio"/> | <input type="radio"/> | <input type="radio"/> |
| Following recommended infection, prevention and control procedures adds unnecessary additional strain to my workload.                               | <input type="radio"/>    | <input type="radio"/> | <input type="radio"/> | <input type="radio"/> | <input type="radio"/> | <input type="radio"/> | <input type="radio"/> |

**Intentions**

|                                                                                                                                      | Strongly disagree (1) | 2                     | 3                     | 4                     | 5                     | 6                     | Strongly agree (7)    |
|--------------------------------------------------------------------------------------------------------------------------------------|-----------------------|-----------------------|-----------------------|-----------------------|-----------------------|-----------------------|-----------------------|
| I will always use a medical mask, eye protection, gown and gloves when taking care of patients with suspected or confirmed Covid-19. | <input type="radio"/> |



**Environmental context and resources**

|                                                                                                                                                                                                                | Strongly disagree<br>(1) | 2                     | 3                     | 4                     | 5                     | 6                     | Strongly agree (7)    |
|----------------------------------------------------------------------------------------------------------------------------------------------------------------------------------------------------------------|--------------------------|-----------------------|-----------------------|-----------------------|-----------------------|-----------------------|-----------------------|
| There are clear policies and protocols in my hospital for everyone to follow related to Covid-19                                                                                                               | <input type="radio"/>    | <input type="radio"/> | <input type="radio"/> | <input type="radio"/> | <input type="radio"/> | <input type="radio"/> | <input type="radio"/> |
| I can easily access personal protective equipment (PPE) in line with standard infection control precautions, such as gloves, apron and fluid resistant surgical mask for Covid-19 in the hospital where I work | <input type="radio"/>    | <input type="radio"/> | <input type="radio"/> | <input type="radio"/> | <input type="radio"/> | <input type="radio"/> | <input type="radio"/> |
| In my hospital there are dedicated isolation facilities for patients with suspected Covid-19                                                                                                                   | <input type="radio"/>    | <input type="radio"/> | <input type="radio"/> | <input type="radio"/> | <input type="radio"/> | <input type="radio"/> | <input type="radio"/> |
| I can easily access dedicated isolation facilities for patients with suspected Covid-19                                                                                                                        | <input type="radio"/>    | <input type="radio"/> | <input type="radio"/> | <input type="radio"/> | <input type="radio"/> | <input type="radio"/> | <input type="radio"/> |
| I have someone to turn to if I have a problem using the personal protective equipment                                                                                                                          | <input type="radio"/>    | <input type="radio"/> | <input type="radio"/> | <input type="radio"/> | <input type="radio"/> | <input type="radio"/> | <input type="radio"/> |
| I have someone to turn to if I had body fluid exposure or contact with a confirmed case                                                                                                                        | <input type="radio"/>    | <input type="radio"/> | <input type="radio"/> | <input type="radio"/> | <input type="radio"/> | <input type="radio"/> | <input type="radio"/> |
| The hospital where I work is well supported by local public health authorities, with written guidance on how to manage Covid-19                                                                                | <input type="radio"/>    | <input type="radio"/> | <input type="radio"/> | <input type="radio"/> | <input type="radio"/> | <input type="radio"/> | <input type="radio"/> |
| The hospital where I work is well supported by local public health authorities, with training material on how to manage Covid-19.                                                                              | <input type="radio"/>    | <input type="radio"/> | <input type="radio"/> | <input type="radio"/> | <input type="radio"/> | <input type="radio"/> | <input type="radio"/> |

**Social Influences**

|                                                                                                                        | Strongly disagree<br>(1) | 2                     | 3                     | 4                     | 5                     | 6                     | Strongly agree (7)    |
|------------------------------------------------------------------------------------------------------------------------|--------------------------|-----------------------|-----------------------|-----------------------|-----------------------|-----------------------|-----------------------|
| My colleagues follow IPC guidelines                                                                                    | <input type="radio"/>    | <input type="radio"/> | <input type="radio"/> | <input type="radio"/> | <input type="radio"/> | <input type="radio"/> | <input type="radio"/> |
| As a healthcare worker there is an expectation that I will follow IPC guidelines                                       | <input type="radio"/>    | <input type="radio"/> | <input type="radio"/> | <input type="radio"/> | <input type="radio"/> | <input type="radio"/> | <input type="radio"/> |
| I am encouraged and supported by senior medical/nurse staff to apply proper infection prevention and control measures. | <input type="radio"/>    | <input type="radio"/> | <input type="radio"/> | <input type="radio"/> | <input type="radio"/> | <input type="radio"/> | <input type="radio"/> |
| I encourage and support my more junior colleagues to apply proper infection prevention and control measures.           | <input type="radio"/>    | <input type="radio"/> | <input type="radio"/> | <input type="radio"/> | <input type="radio"/> | <input type="radio"/> | <input type="radio"/> |

| Emotion                                                                                         | Strongly disagree (1) | 2                     | 3                     | 4                     | 5                     | 6                     | Strongly agree (7)    |
|-------------------------------------------------------------------------------------------------|-----------------------|-----------------------|-----------------------|-----------------------|-----------------------|-----------------------|-----------------------|
| I am concerned about the risk to myself of becoming ill with Covid-19                           | <input type="radio"/> |
| I am concerned about the risk to my family related to Covid-19 as a result of my job role       | <input type="radio"/> |
| I am afraid of looking after patients who are ill with Covid-19                                 | <input type="radio"/> |
| I will try to avoid contact with patients who have Covid-19                                     | <input type="radio"/> |
| I accept that the risk of getting Covid-19 is part of my job                                    | <input type="radio"/> |
| I have little control over whether I get infected with Covid-19 or not                          | <input type="radio"/> |
| I am looking for another job or thinking about leaving this job because of the risk of Covid-19 | <input type="radio"/> |

| Trust                                                                                                         | Strongly disagree (1) | 2                     | 3                     | 4                     | 5                     | 6                     | Strongly agree (7)    |
|---------------------------------------------------------------------------------------------------------------|-----------------------|-----------------------|-----------------------|-----------------------|-----------------------|-----------------------|-----------------------|
| The health facility where I work is ready to manage Covid-19                                                  | <input type="radio"/> |
| The regional government is ready to manage an outbreak of Covid-19                                            | <input type="radio"/> |
| The national government is ready to manage an outbreak of Covid-19                                            | <input type="radio"/> |
| The health facility would be honest with its staff when managing an outbreak of Covid-19                      | <input type="radio"/> |
| The regional government would be honest with its staff when managing an outbreak of Covid-19                  | <input type="radio"/> |
| The national government would be honest with its staff when managing an outbreak of Covid-19                  | <input type="radio"/> |
| The health facility where I work would act in the best interests of its staff when managing Covid-19          | <input type="radio"/> |
| The regional government would act in the best interests of its citizens when managing an outbreak of Covid-19 | <input type="radio"/> |
| The national government would act in the best interests of its citizens when managing an outbreak of Covid-19 | <input type="radio"/> |

**Demographic information**

What is your age?

\_\_\_\_\_

What is your marital status?

- Single (never married)
- Living with partner
- Married /Civil partnership
- Separated
- Divorced
- Widowed
- Prefer not to say

How many children do you have under 17 years of age?

- 1
- 2
- 3
- 4
- 5+
- None
- Prefer not to say

What is your role in healthcare?

- Attending physician
- Fellow
- Resident
- Medical student
- Bedside nurse
- Charge nurse
- Nurse practitioner
- Respiratory therapist
- Physician assistant
- Other

What type of clinical service are you primarily practicing in?

- Community hospital
- Academic hospital
- Outpatient
- Other

Do you provide direct care to patients?

- Yes
- No
- Unsure

What is the type of your job role?

- Full time
- Part time
- Casual or locum staff

What is the length of time since initiating independent practice, if relevant (in years)?

\_\_\_\_\_

# Trust Calculator

---

Trust score

---
